# Supplementary material for: Impact of the Ku Complex on HIV-1 Expression and Latency
Source: PubMed Central journal article supplement (PMC3726783; doi:10.1371/journal.pone.0069691), 2013-07-29

# Supplementary Figure 6 (continued)

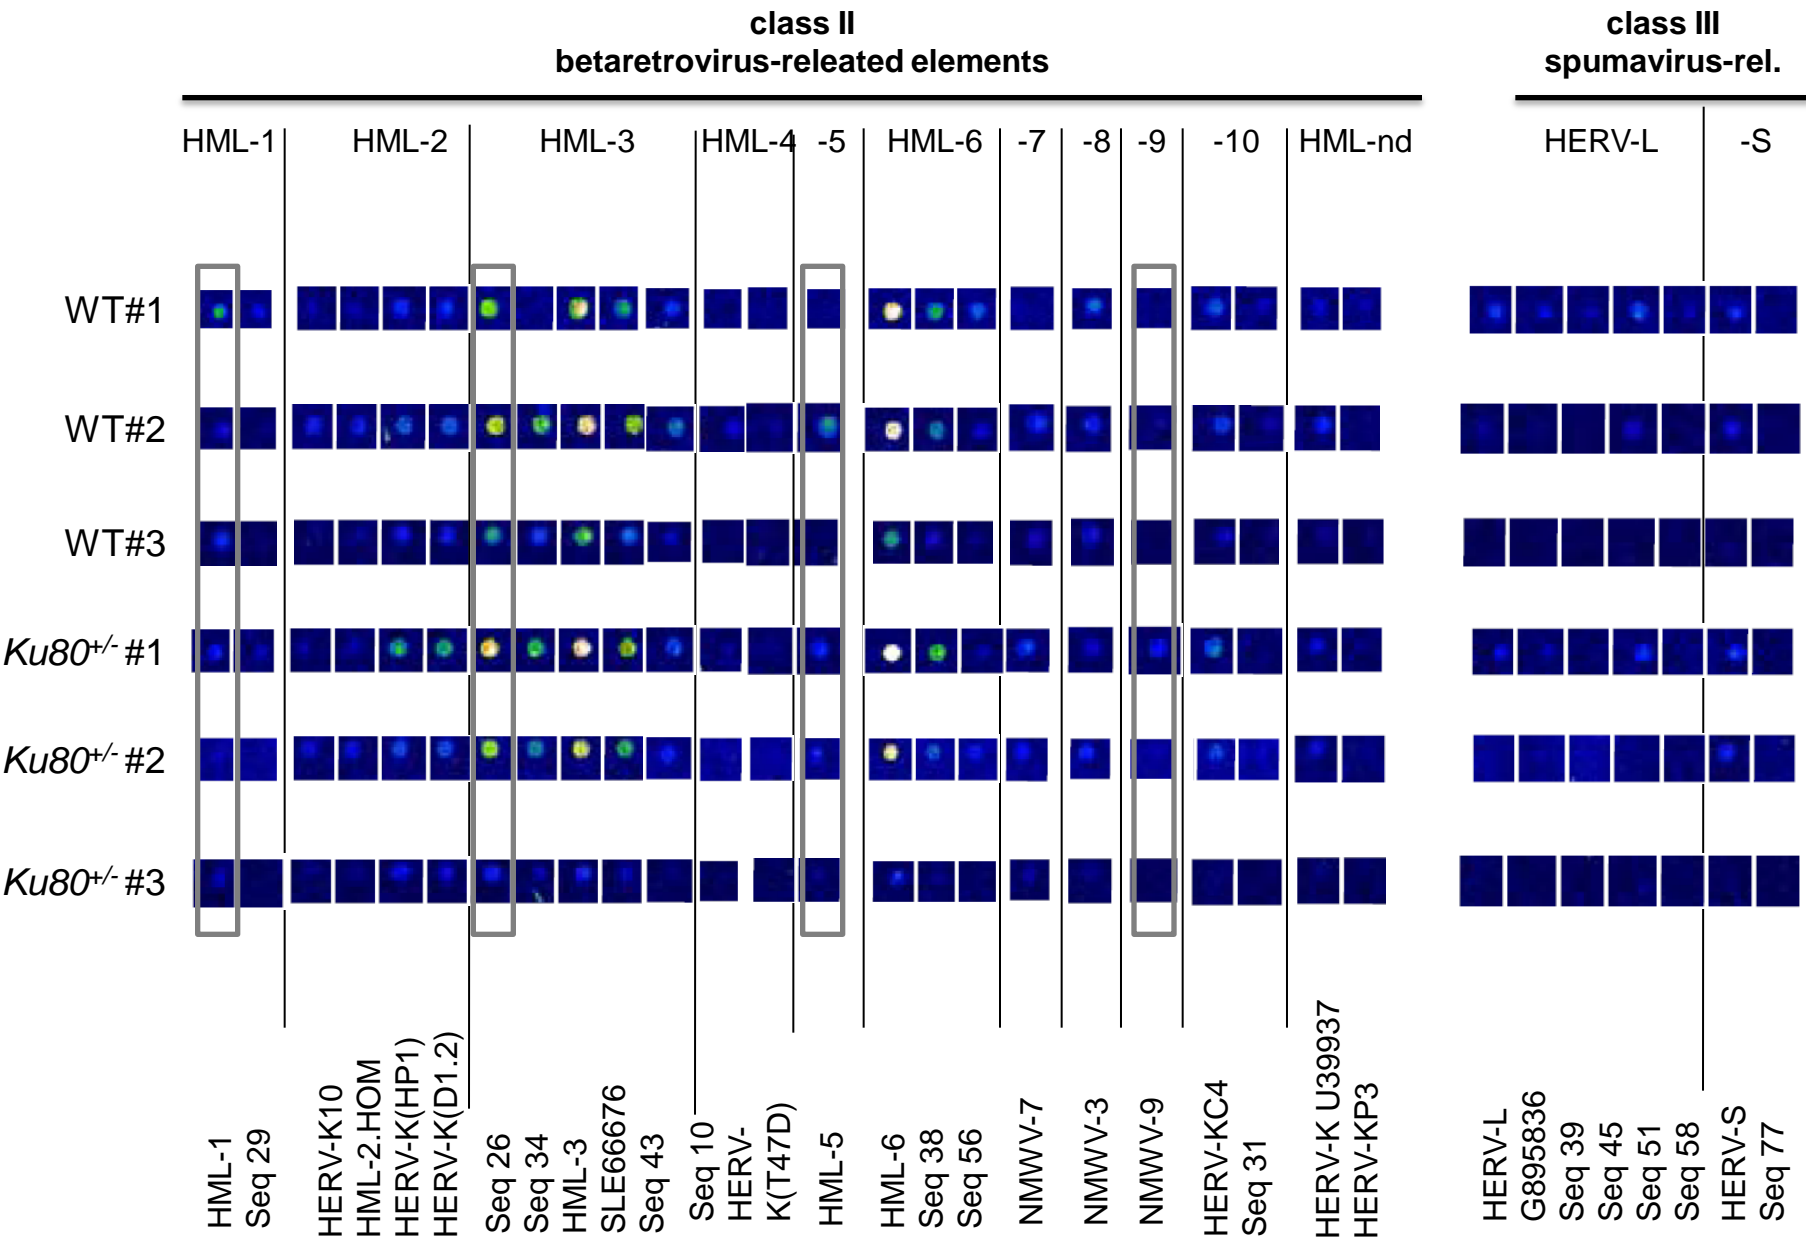

Supplement: pone.0069691.s006.pdf [file pone.0069691.s006.pdf]
